# Supplementary material for: Phosphorylation of caspase-9 at Thr125 directs paclitaxel resistance in ovarian cancer
Source: PubMed Central journal article supplement (PMC5787417; doi:10.18632/oncotarget.23133), 2017-12-08
Supplement: oncotarget-09-1041-s001.pdf [file oncotarget-09-1041-s001.pdf]

## Phosphorylation of caspase-9 at Thr125 directs paclitaxel resistance in ovarian cancer

### SUPPLEMENTARY MATERIALS

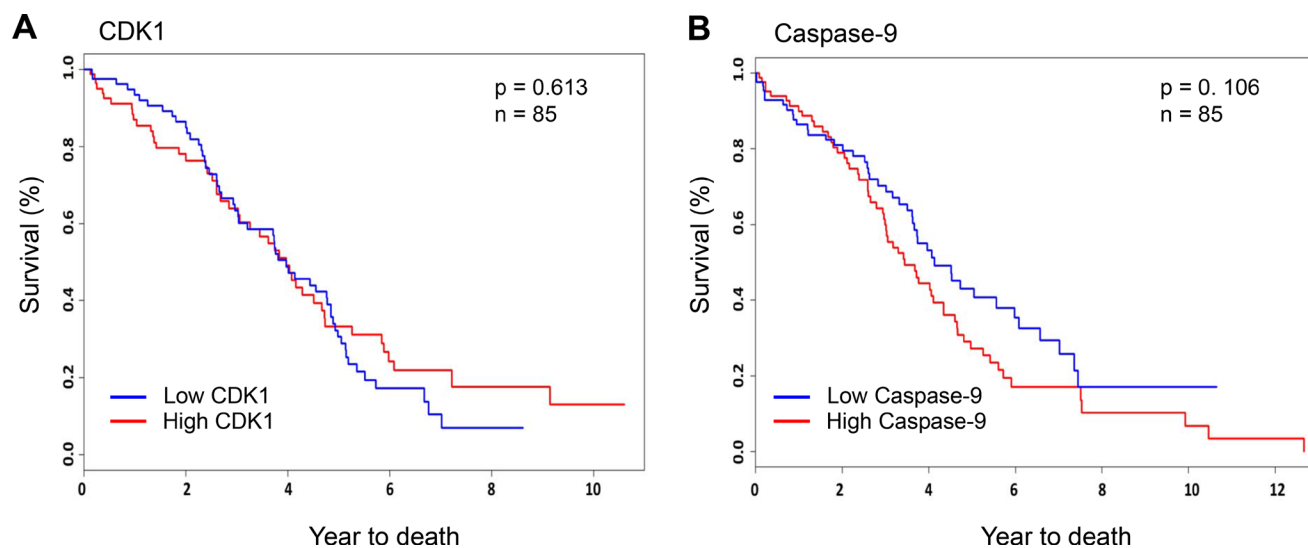

**Supplementary Figure 1: Correlation analysis between CDK1 or caspase-9 expression level and patients survivals.** (A) We tested if the expression of CDK1 may shorten patient survival, given its close association with drug resistance. Gene expression data were selected from 567 patients with a survival record from The Cancer Genome Atlas (TCGA). Based on CDK1 expression level, the data were divided into 85 patients in top 15% and another 85 patients in bottom 15%. In contrast to our expectation, no significant difference was observed between the two groups. (B) The patients with > 15% caspase-9 expression showed shorter survival after diagnosis.
